# Supplementary material for: The effect of year and variety on the nutritional value of Camelina sativa meal
Source: Springer Nature journal article supplement (doi:10.1007/s00217-025-04672-7), 2025-02-11
Supplement: MOESM1 [file 217_2025_4672_MOESM1_ESM.docx]

**Table 1S.** Temperature at the growing location

during the cultural cycle of camelina.

|  | **T min**  **(°C)** | **T media (°C)** | **T max (°C)** |
| --- | --- | --- | --- |
| **2016** |  |  |  |
| **March** | 4.69 | 9.51 | 14.55 |
| **April** | 9.14 | 14.61 | 20.17 |
| **May** | 11.34 | 16.70 | 22.08 |
| **June** | 15.62 | 21.53 | 27.39 |
| **2017** |  |  |  |
| **March** | 4.40 | 11.46 | 18.80 |
| **April** | 7.70 | 14.15 | 20.69 |
| **May** | 11.23 | 17.10 | 22.92 |
| **June** | 16.23 | 23.80 | 30.35 |
| **2018** |  |  |  |
| **March** | 2.71 | 7.39 | 12.08 |
| **April** | 9.24 | 15.86 | 22.26 |
| **May** | 13.96 | 19.02 | 24.52 |
| **June** | 16.11 | 22.54 | 28.71 |
| **2019** |  |  |  |
| **March** | 3.01 | 10.43 | 18.05 |
| **April** | 6.42 | 13.00 | 18.71 |
| **May** | 10.47 | 15.06 | 19.97 |
| **June** | 14.33 | 22.63 | 29.30 |
